# Supplementary material for: Tracing the Origin of Korean Invasive Populations of the Spotted Lanternfly, Lycorma delicatula (Hemiptera: Fulgoridae)
Source: MDPI journal article supplement (doi:10.3390/insects12060539), 2021-06-10
Supplement: s1 [file s1]

# Tracing the origin of Korean invasive populations of the spotted lanternfly, *Lycorma delicatula* (Hemiptera: Fulgoridae)

Hyojoong Kim <sup>1,\*</sup>, Sohee Kim <sup>1,2,†</sup>, Yerim Lee <sup>1,\*</sup>, Heung-Sik Lee <sup>2</sup>, Seong-Jin Lee <sup>2</sup> and Jong-Ho Lee <sup>2</sup>

<sup>1</sup> Animal Systematics Laboratory, Department of Biology, Kunsan National University, Gunsan, Jeonbuk 54150, Republic of Korea

<sup>2</sup> Animal & Plant Quarantine Agency, Gimcheon, Gyeongbuk 39660, Republic of Korea

<sup>†</sup> These authors are equally contributed

\* Correspondence: HK: hkim@kunsan.ac.kr; YL: yleeii@snu.ac.kr

## Supplementary material 1

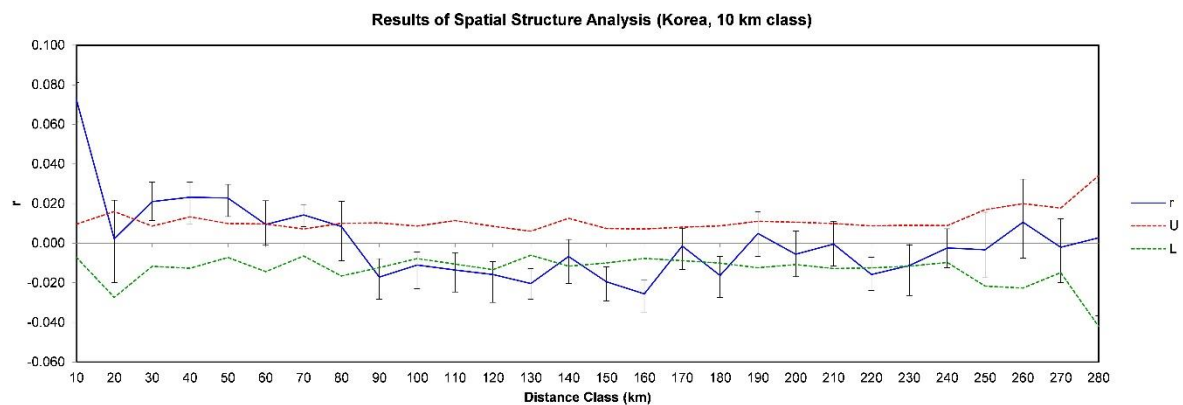

**Figure S1.** Spatial autocorrelation analysis at 10 km distance class using Korean pops.  $r$  (blue line) means autocorrelation coefficient,  $U$  (dashed red) +95% confidence,  $L$  (dashed green) - 95% confidence

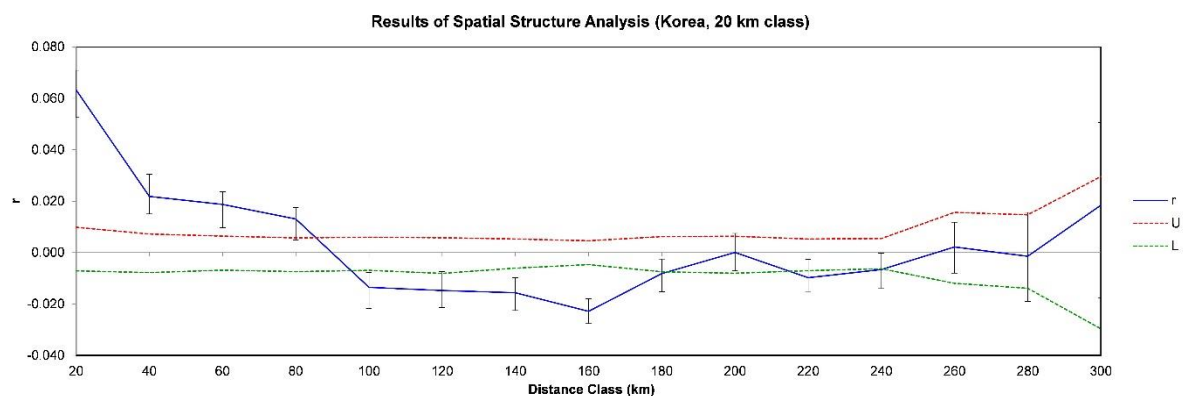

**Figure S2.** Spatial autocorrelation analysis at 20 km distance class using Korean pops.  $r$  (blue line) means autocorrelation coefficient,  $U$  (dashed red) +95% confidence,  $L$  (dashed green) - 95% confidence

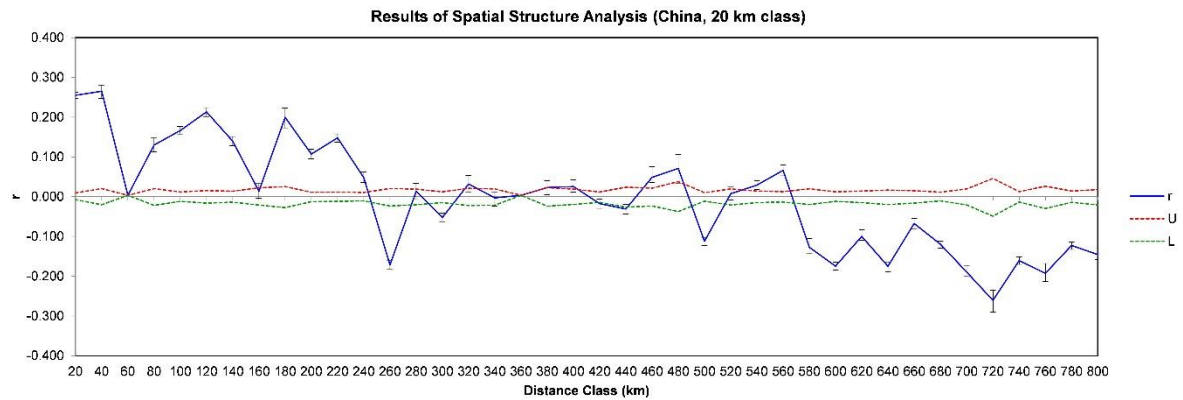

**Figure S3.** Spatial autocorrelation analysis at 20 km distance class using Chinese pops.  $r$  (blue line) means autocorrelation coefficient,  $U$  (dashed red) +95% confidence,  $L$  (dashed green) -95% confidence

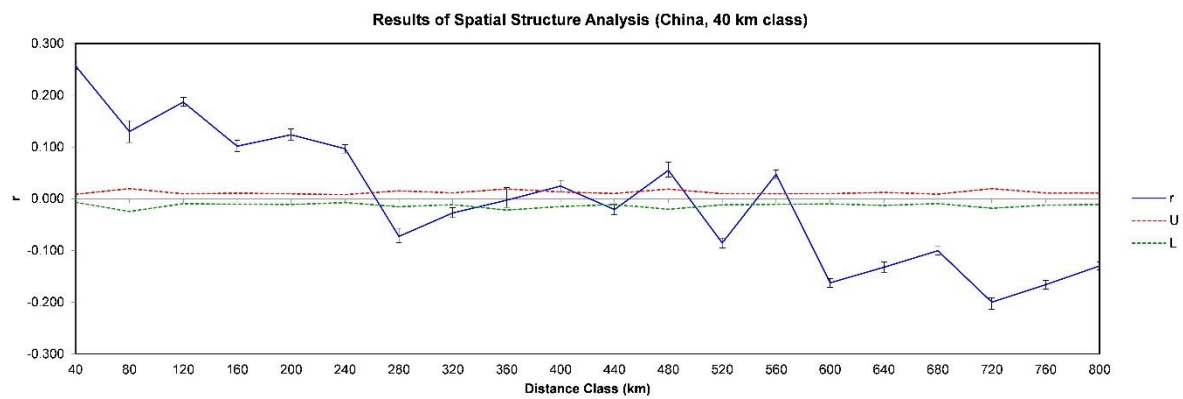

**Figure S4.** Spatial autocorrelation analysis at 10 km distance class using Chinese pops.  $r$  (blue line) means autocorrelation coefficient,  $U$  (dashed red) +95% confidence,  $L$  (dashed green) -95% confidence

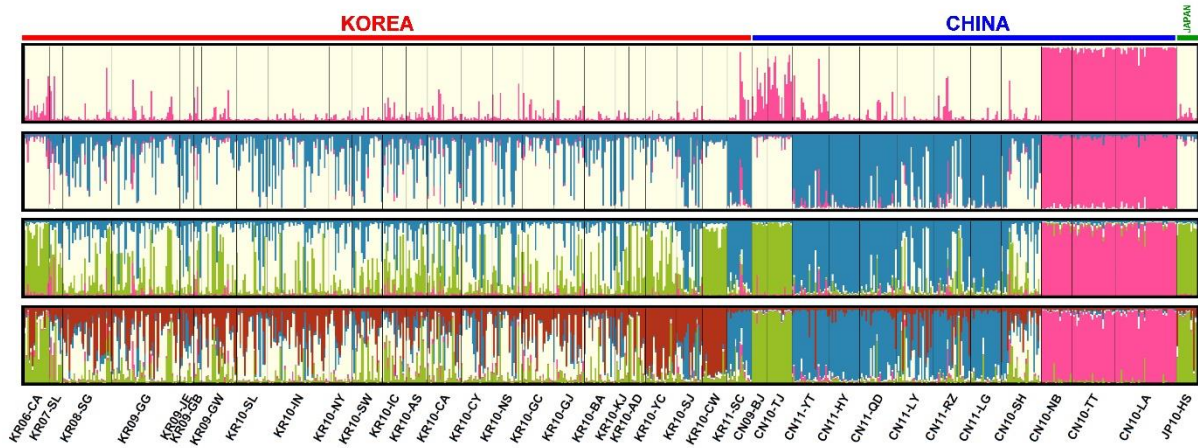

**Figure S5.** Genetic structure of *L. delicatula* for 762 individuals collected from Korea, China and Japan, visualized by individual assignment. In order from the top to the bottom, each genetic structure is shown when  $K = 2$  (white/pink), 3 (white/pink/blue), 4 (white/pink/blue/green) or 5 (white/pink/blue/red), respectively.

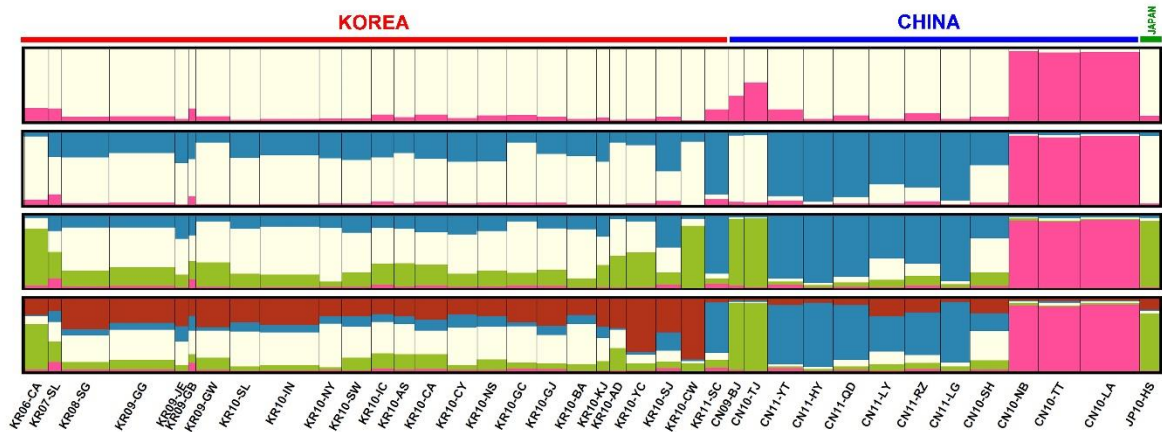

**Figure S6.** Genetic structure of *L. delicatula* for 762 individuals collected from Korea, China and Japan, visualized by group (pop.) assignment. In order from the top to the bottom, each genetic structure is shown when  $K = 2$  (white/pink), 3 (white/pink/blue), 4 (white/pink/blue/green) or 5 (white/pink/blue/red), respectively.

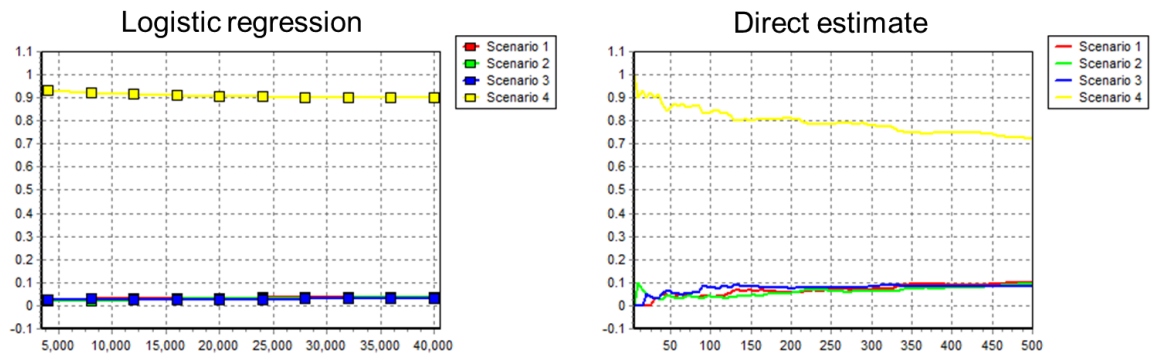

**Figure S7.** Plots output by DIYABC showing the posterior probability (y-axis) of the three scenarios through the logistic regression (left) and direct estimate (right) approaches as output by DIYABC. The x-axis corresponds to the different  $n\delta$  values used in the computations.

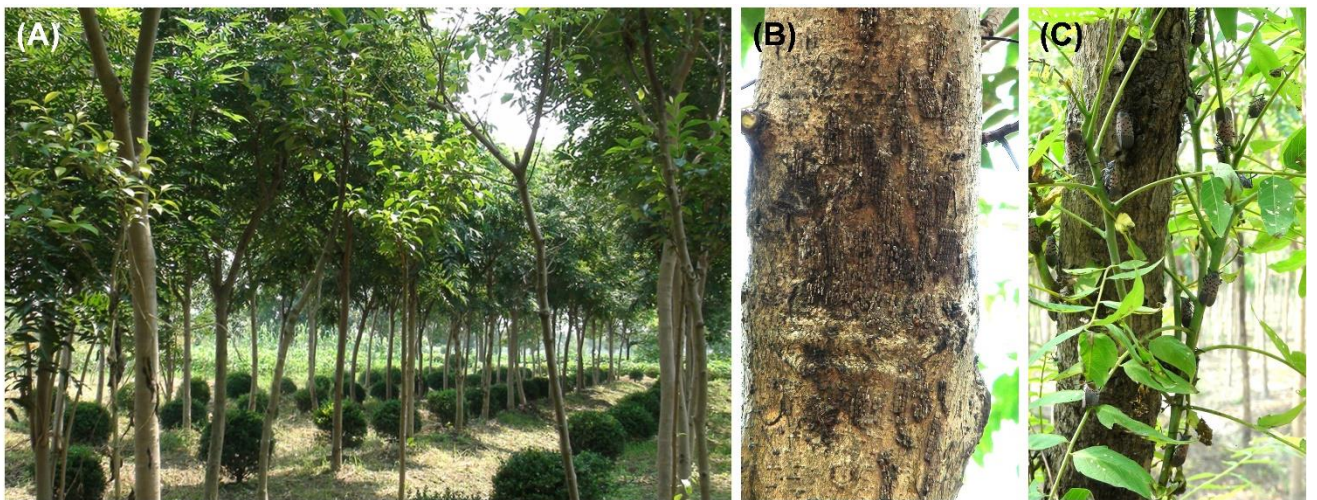

**Figure S8.** Photographs of a collection site of CN10-SH as strongly inferred to the main source area; (A) planted density of the host plants (*A. alitissima*), (B) egg masses on a tree bark, (C) large number of SLF adults on a tree.
