# Supplementary material for: Tracing the Origin of Korean Invasive Populations of the Spotted Lanternfly, Lycorma delicatula (Hemiptera: Fulgoridae)
Source: MDPI journal article supplement (doi:10.3390/insects12060539), 2021-06-10
Supplement: s1 [file s1]

# Tracing the origin of Korean invasive populations of the spotted lanternfly, *Lycorma delicatula* (Hemiptera: Fulgoridae)

Hyojoong Kim <sup>1,\*,+</sup>, Sohee Kim <sup>1,2,+</sup>, Yerim Lee <sup>1,\*</sup>, Heung-Sik Lee <sup>2</sup>, Seong-Jin Lee <sup>2</sup> and Jong-Ho Lee <sup>2</sup>

<sup>1</sup> Animal Systematics Laboratory, Department of Biology, Kunsan National University, Gunsan, Jeonbuk 54150, Republic of Korea

<sup>2</sup> Animal & Plant Quarantine Agency, Gimcheon, Gyeongbuk 39660, Republic of Korea

<sup>+</sup> These authors are equally contributed

<sup>\*</sup> Correspondence: HK: hkim@kunsan.ac.kr; YL: yleeii@snu.ac.kr

**Supplementary material 2**

**Table S1.** Pairwise  $F_{ST}$  divergences between 38 different geographical populations of the SLF. Pairwise G test values are above the diagonal and pairwise  $F_{ST}$  values are below the diagonal. Red and bold  $F_{ST}$  values mean those significantly different from zero at  $P < 0.001$ .

|           | KR06-<br>CA | KR07-<br>SL  | KR08-<br>SG  | KR09-<br>GG  | KR09-<br>JE   | KR09-<br>GB  | KR09-<br>GW  | KR10-<br>SL  | KR10-<br>IN  | KR10-<br>NY  | KR10-<br>SW   | KR10-<br>IC   | KR10-<br>AS  | KR10-<br>CA  | KR10-<br>CY   | KR10-<br>NS   | KR10-<br>GC  | KR10-<br>GJ   | KR10-<br>BA   | KR10-<br>KJ  |
|-----------|-------------|--------------|--------------|--------------|---------------|--------------|--------------|--------------|--------------|--------------|---------------|---------------|--------------|--------------|---------------|---------------|--------------|---------------|---------------|--------------|
| / KR06-CA | -           | 2.568        | 1.567        | 2.036        | 1.978         | 2.339        | 1.882        | 1.539        | 1.900        | 1.779        | 2.160         | 2.576         | 3.084        | 2.833        | 2.083         | 2.058         | 2.236        | 2.298         | 1.628         | 2.233        |
| / KR07-SL | 0.089       | -            | 2.823        | 3.270        | 6.579         | 6.571        | 3.177        | 2.976        | 3.358        | 3.929        | 2.949         | 2.686         | 3.759        | 5.834        | 5.536         | 4.872         | 2.270        | 2.967         | 3.000         | 2.594        |
| / KR08-SG | 0.138       | 0.081        | -            | 21.302       | 10.132        | 2.839        | 13.906       | 29.619       | 16.665       | 6.281        | 4.851         | 4.447         | 4.929        | 6.296        | 5.222         | 13.191        | 8.371        | 7.391         | 24.022        | 18.819       |
| / KR09-GG | 0.109       | 0.071        | 0.012        | -            | 13.517        | 9.554        | 10.357       | 102.631      | 15.583       | 12.922       | 12.077        | 19.686        | 15.483       | 22.898       | 13.456        | 67.870        | 11.886       | 13.411        | 24.093        | 18.379       |
| / KR09-JE | 0.112       | <b>0.037</b> | <b>0.024</b> | <b>0.018</b> | -             | 7.319        | 18.951       | 12.505       | 46.566       | Infinity     | 12.269        | 6.019         | 9.802        | 11.114       | 20.497        | 61.025        | 6.868        | 5.049         | 12.887        | 8.834        |
| / KR09-GB | 0.097       | <b>0.037</b> | 0.081        | <b>0.026</b> | <b>0.033</b>  | -            | 2.316        | 4.724        | 5.228        | 9.671        | 5.060         | 7.419         | 8.151        | 8.017        | 25.234        | 21.661        | 4.401        | 12.023        | 5.018         | 4.237        |
| / KR09-GW | 0.117       | 0.073        | 0.018        | 0.024        | <b>0.013</b>  | 0.097        | -            | 12.584       | 8.434        | 9.429        | 5.639         | 4.503         | 4.678        | 7.162        | 4.587         | 6.901         | 4.964        | 4.162         | 5.834         | 6.743        |
| / KR10-SL | 0.140       | 0.077        | <b>0.008</b> | <b>0.002</b> | <b>0.020</b>  | 0.050        | 0.019        | -            | 22.813       | 13.374       | 33.903        | 14.319        | 7.476        | 10.792       | 12.120        | 247.275       | 9.917        | 11.672        | 94.447        | 32.951       |
| / KR10-IN | 0.116       | 0.069        | 0.015        | 0.016        | <b>0.005</b>  | 0.046        | 0.029        | <b>0.011</b> | -            | 15.493       | 8.908         | 5.384         | 5.819        | 7.587        | 9.037         | 21.913        | 8.510        | 7.173         | 21.209        | 10.361       |
| / KR10-NY | 0.123       | 0.060        | 0.038        | 0.019        | <b>-0.004</b> | <b>0.025</b> | 0.026        | 0.018        | 0.016        | -            | 7.521         | 5.494         | 6.836        | 5.761        | 7.737         | 11.999        | 7.841        | 7.987         | 9.962         | 10.620       |
| / KR10-SW | 0.104       | 0.078        | 0.049        | 0.020        | <b>0.020</b>  | 0.047        | 0.042        | <b>0.007</b> | 0.027        | 0.032        | -             | Infinity      | 28.820       | 18.269       | 17.405        | 19.544        | 8.749        | 8.682         | 12.083        | 15.910       |
| / KR10-IC | 0.088       | 0.085        | 0.053        | <b>0.013</b> | 0.040         | <b>0.033</b> | 0.053        | <b>0.017</b> | 0.044        | 0.044        | <b>-0.003</b> | -             | Infinity     | Infinity     | 44.633        | 31.760        | 11.042       | 9.006         | 11.460        | 24.700       |
| / KR10-AS | 0.075       | 0.062        | 0.048        | 0.016        | 0.025         | <b>0.030</b> | 0.051        | 0.032        | 0.041        | 0.035        | <b>0.009</b>  | <b>-0.004</b> | -            | 567.932      | 19.718        | 29.547        | 15.745       | 18.351        | 23.905        | 80.919       |
| / KR10-CA | 0.081       | 0.041        | 0.038        | 0.011        | 0.022         | <b>0.030</b> | 0.034        | 0.023        | 0.032        | 0.042        | 0.014         | <b>-0.000</b> | <b>0.000</b> | -            | 454.295       | 126.013       | 7.875        | 8.280         | 10.754        | 9.726        |
| / KR10-CY | 0.107       | 0.043        | 0.046        | 0.018        | <b>0.012</b>  | <b>0.010</b> | 0.052        | 0.020        | 0.027        | 0.031        | 0.014         | <b>0.006</b>  | <b>0.013</b> | <b>0.001</b> | -             | Infinity      | 8.182        | 5.903         | 16.608        | 8.449        |
| / KR10-NS | 0.108       | 0.049        | <b>0.019</b> | <b>0.004</b> | <b>0.004</b>  | <b>0.011</b> | 0.035        | <b>0.001</b> | <b>0.011</b> | <b>0.020</b> | <b>0.013</b>  | <b>0.008</b>  | <b>0.008</b> | <b>0.002</b> | <b>-0.010</b> | -             | 12.771       | 8.891         | Infinity      | 19.373       |
| / KR10-GC | 0.101       | 0.099        | 0.029        | 0.021        | 0.035         | 0.054        | 0.048        | 0.025        | 0.029        | 0.031        | 0.028         | 0.022         | <b>0.016</b> | 0.031        | 0.030         | 0.019         | -            | 17.087        | 39.686        | 79.368       |
| / KR10-GJ | 0.098       | 0.078        | 0.033        | 0.018        | 0.047         | <b>0.020</b> | 0.057        | 0.021        | 0.034        | 0.030        | 0.028         | 0.027         | <b>0.013</b> | 0.029        | 0.041         | 0.027         | <b>0.014</b> | -             | 18.951        | Infinity     |
| / KR10-BA | 0.133       | 0.077        | <b>0.010</b> | <b>0.010</b> | <b>0.019</b>  | 0.047        | 0.041        | 0.003        | 0.012        | 0.024        | 0.020         | 0.021         | <b>0.010</b> | 0.023        | 0.015         | <b>-0.002</b> | <b>0.006</b> | <b>0.013</b>  | -             | Infinity     |
| / KR10-KJ | 0.101       | 0.088        | <b>0.013</b> | <b>0.013</b> | <b>0.028</b>  | <b>0.056</b> | <b>0.036</b> | <b>0.008</b> | <b>0.024</b> | <b>0.023</b> | <b>0.015</b>  | <b>0.010</b>  | <b>0.003</b> | 0.025        | 0.029         | <b>0.013</b>  | <b>0.003</b> | <b>-0.004</b> | <b>-0.003</b> | -            |
| / KR10-AD | 0.121       | 0.071        | 0.074        | 0.049        | 0.052         | 0.049        | <b>0.067</b> | 0.040        | 0.056        | 0.074        | 0.038         | 0.055         | 0.047        | 0.046        | 0.048         | 0.028         | 0.101        | 0.061         | 0.059         | 0.058        |
| / KR10-YC | 0.121       | 0.082        | 0.059        | 0.067        | 0.085         | 0.093        | 0.095        | 0.090        | 0.087        | 0.117        | 0.111         | 0.100         | 0.057        | 0.063        | 0.089         | 0.065         | 0.093        | 0.054         | 0.072         | 0.064        |
| / KR10-SJ | 0.159       | 0.092        | 0.088        | 0.092        | 0.105         | 0.055        | 0.130        | 0.095        | 0.073        | 0.086        | 0.135         | 0.137         | 0.113        | 0.112        | 0.112         | 0.085         | 0.106        | 0.052         | 0.088         | 0.080        |
| / KR11-CW | 0.261       | 0.283        | 0.183        | 0.221        | 0.289         | 0.408        | 0.219        | 0.240        | 0.191        | 0.289        | 0.289         | 0.307         | 0.301        | 0.260        | 0.284         | 0.244         | 0.272        | 0.266         | 0.248         | 0.272        |
| / KR11-SC | 0.147       | 0.102        | 0.115        | 0.098        | 0.065         | 0.121        | 0.115        | 0.099        | 0.087        | 0.078        | 0.071         | 0.069         | 0.065        | 0.077        | 0.075         | 0.079         | 0.081        | 0.111         | 0.084         | 0.081        |
| / CN09-BJ | 0.105       | 0.124        | 0.173        | 0.165        | 0.154         | 0.133        | 0.195        | 0.172        | 0.153        | 0.178        | 0.140         | 0.145         | 0.137        | 0.132        | 0.141         | 0.139         | 0.148        | 0.138         | 0.160         | 0.150        |
| / CN10-TJ | 0.192       | 0.163        | 0.227        | 0.203        | 0.212         | 0.164        | 0.251        | 0.209        | 0.213        | 0.233        | 0.175         | 0.178         | 0.176        | 0.165        | 0.152         | 0.160         | 0.194        | 0.193         | 0.198         | 0.210        |
| / CN11-YT | 0.151       | 0.122        | 0.108        | 0.104        | 0.108         | 0.089        | 0.136        | 0.103        | 0.091        | 0.104        | 0.118         | 0.102         | 0.107        | 0.095        | 0.095         | 0.080         | 0.088        | 0.099         | 0.101         | 0.102        |
| / CN11-HY | 0.164       | 0.177        | 0.130        | 0.127        | 0.123         | 0.127        | 0.159        | 0.140        | 0.100        | 0.113        | 0.146         | 0.136         | 0.131        | 0.137        | 0.132         | 0.114         | 0.094        | 0.130         | 0.124         | 0.132        |
| / CN11-QD | 0.162       | 0.113        | 0.077        | 0.067        | 0.065         | <b>0.049</b> | 0.119        | 0.070        | 0.045        | 0.080        | 0.076         | 0.072         | 0.076        | 0.074        | 0.048         | 0.038         | 0.072        | 0.078         | 0.050         | 0.085        |
| / CN11-LY | 0.161       | 0.087        | 0.086        | 0.071        | 0.069         | 0.059        | 0.121        | 0.077        | 0.073        | 0.078        | 0.073         | 0.073         | 0.074        | 0.071        | 0.061         | 0.061         | 0.069        | 0.069         | 0.066         | 0.093        |
| / CN11-RZ | 0.182       | 0.099        | 0.071        | 0.060        | 0.057         | 0.065        | 0.102        | 0.058        | 0.051        | 0.076        | 0.065         | 0.083         | 0.077        | 0.060        | 0.057         | 0.041         | 0.069        | 0.076         | 0.055         | 0.095        |
| / CN11-LG | 0.165       | 0.096        | 0.052        | 0.039        | 0.050         | 0.077        | 0.072        | 0.037        | 0.045        | 0.071        | 0.048         | 0.052         | 0.063        | 0.033        | 0.034         | 0.023         | 0.044        | 0.075         | 0.040         | 0.076        |
| / CN10-SH | 0.105       | 0.068        | 0.021        | 0.015        | <b>0.003</b>  | <b>0.037</b> | 0.037        | 0.017        | <b>0.006</b> | <b>0.022</b> | <b>0.019</b>  | <b>0.017</b>  | <b>0.010</b> | <b>0.015</b> | <b>0.008</b>  | <b>-0.004</b> | <b>0.012</b> | 0.032         | <b>-0.000</b> | <b>0.015</b> |
| / CN10-NB | 0.201       | 0.230        | 0.257        | 0.249        | 0.263         | 0.206        | 0.293        | 0.279        | 0.239        | 0.254        | 0.265         | 0.232         | 0.218        | 0.224        | 0.224         | 0.220         | 0.198        | 0.226         | 0.225         | 0.221        |
| / CN10-TT | 0.198       | 0.186        | 0.196        | 0.192        | 0.202         | 0.145        | 0.234        | 0.213        | 0.198        | 0.194        | 0.207         | 0.185         | 0.168        | 0.177        | 0.171         | 0.165         | 0.148        | 0.171         | 0.172         | 0.170        |
| / CN10-LA | 0.228       | 0.239        | 0.248        | 0.243        | 0.264         | 0.187        | 0.292        | 0.264        | 0.251        | 0.254        | 0.259         | 0.221         | 0.218        | 0.225        | 0.224         | 0.218         | 0.201        | 0.218         | 0.224         | 0.217        |
| / JP10-HS | 0.140       | 0.111        | 0.099        | 0.098        | 0.125         | 0.111        | 0.115        | 0.129        | 0.129        | 0.150        | 0.147         | 0.131         | 0.102        | 0.097        | 0.130         | 0.097         | 0.142        | 0.111         | 0.127         | 0.123        |

Table S1. (continued)

|           | KR10-<br>AD | KR10-<br>YC | KR10-<br>SJ | KR11-<br>CW | KR11-<br>SC | CN09-<br>BJ | CN10-<br>TJ | CN11-<br>YT | CN11-<br>HY | CN11-<br>QD | CN11-<br>LY | CN11-<br>RZ | CN11-<br>LG | CN10-<br>SH | CN10-<br>NB | CN10-<br>TT | CN10-<br>LA | JP10-<br>HS |
|-----------|-------------|-------------|-------------|-------------|-------------|-------------|-------------|-------------|-------------|-------------|-------------|-------------|-------------|-------------|-------------|-------------|-------------|-------------|
| / KR06-CA | 1.809       | 1.821       | 1.322       | 0.707       | 1.450       | 2.134       | 1.051       | 1.405       | 1.270       | 1.290       | 1.304       | 1.122       | 1.263       | 2.130       | 0.991       | 1.012       | 0.846       | 1.535       |
| / KR07-SL | 3.280       | 2.791       | 2.464       | 0.632       | 2.190       | 1.758       | 1.280       | 1.791       | 1.160       | 1.967       | 2.622       | 2.270       | 2.358       | 3.409       | 0.836       | 1.094       | 0.797       | 1.996       |
| / KR08-SG | 3.133       | 4.001       | 2.594       | 1.115       | 1.925       | 1.191       | 0.853       | 2.055       | 1.672       | 3.018       | 2.671       | 3.254       | 4.573       | 11.886      | 0.723       | 1.025       | 0.757       | 2.272       |
| / KR09-GG | 4.817       | 3.468       | 2.462       | 0.879       | 2.290       | 1.270       | 0.983       | 2.157       | 1.726       | 3.481       | 3.267       | 3.948       | 6.150       | 16.676      | 0.755       | 1.054       | 0.779       | 2.290       |
| / KR09-JE | 4.604       | 2.691       | 2.141       | 0.614       | 3.569       | 1.371       | 0.929       | 2.055       | 1.776       | 3.581       | 3.349       | 4.131       | 4.743       | 84.784      | 0.700       | 0.991       | 0.696       | 1.753       |
| / KR09-GB | 4.903       | 2.446       | 4.267       | 0.363       | 1.817       | 1.633       | 1.273       | 2.569       | 1.717       | 4.855       | 4.004       | 3.599       | 3.001       | 6.532       | 0.962       | 1.478       | 1.088       | 2.001       |
| / KR09-GW | 3.487       | 2.369       | 1.667       | 0.891       | 1.929       | 1.033       | 0.747       | 1.583       | 1.318       | 1.843       | 1.818       | 2.210       | 3.201       | 6.481       | 0.603       | 0.820       | 0.607       | 1.915       |
| / KR10-SL | 6.030       | 2.517       | 2.369       | 0.790       | 2.278       | 1.199       | 0.947       | 2.166       | 1.529       | 3.327       | 3.012       | 4.089       | 6.540       | 14.430      | 0.647       | 0.925       | 0.698       | 1.681       |
| / KR10-IN | 4.226       | 2.622       | 3.164       | 1.057       | 2.632       | 1.389       | 0.924       | 2.502       | 2.255       | 5.286       | 3.172       | 4.617       | 5.309       | 39.307      | 0.798       | 1.013       | 0.748       | 1.692       |
| / KR10-NY | 3.150       | 1.880       | 2.670       | 0.615       | 2.967       | 1.155       | 0.824       | 2.164       | 1.967       | 2.857       | 2.955       | 3.056       | 3.282       | 11.124      | 0.733       | 1.041       | 0.733       | 1.419       |
| / KR10-SW | 6.279       | 1.999       | 1.596       | 0.616       | 3.269       | 1.530       | 1.175       | 1.863       | 1.467       | 3.041       | 3.194       | 3.614       | 4.958       | 12.812      | 0.695       | 0.960       | 0.717       | 1.447       |
| / KR10-IC | 4.297       | 2.246       | 1.570       | 0.564       | 3.352       | 1.470       | 1.152       | 2.192       | 1.591       | 3.234       | 3.164       | 2.755       | 4.566       | 14.370      | 0.829       | 1.104       | 0.879       | 1.657       |
| / KR10-AS | 5.075       | 4.166       | 1.958       | 0.580       | 3.593       | 1.576       | 1.172       | 2.089       | 1.653       | 3.030       | 3.151       | 2.990       | 3.733       | 24.236      | 0.899       | 1.238       | 0.895       | 2.206       |
| / KR10-CA | 5.180       | 3.727       | 1.972       | 0.710       | 2.978       | 1.648       | 1.262       | 2.393       | 1.577       | 3.132       | 3.279       | 3.921       | 7.226       | 16.037      | 0.865       | 1.164       | 0.860       | 2.328       |
| / KR10-CY | 4.936       | 2.550       | 1.991       | 0.631       | 3.065       | 1.520       | 1.394       | 2.388       | 1.642       | 4.916       | 3.828       | 4.147       | 7.206       | 31.966      | 0.866       | 1.208       | 0.864       | 1.678       |
| / KR10-NS | 8.753       | 3.625       | 2.700       | 0.774       | 2.914       | 1.555       | 1.312       | 2.894       | 1.947       | 6.301       | 3.875       | 5.921       | 10.841      | Infinity    | 0.886       | 1.267       | 0.895       | 2.338       |
| / KR10-GC | 2.220       | 2.449       | 2.110       | 0.668       | 2.820       | 1.436       | 1.037       | 2.595       | 2.421       | 3.244       | 3.349       | 3.373       | 5.434       | 20.583      | 1.013       | 1.435       | 0.996       | 1.510       |
| / KR10-GJ | 3.829       | 4.385       | 4.539       | 0.688       | 1.999       | 1.564       | 1.046       | 2.278       | 1.675       | 2.952       | 3.370       | 3.050       | 3.070       | 7.624       | 0.858       | 1.208       | 0.896       | 1.997       |
| / KR10-BA | 4.003       | 3.237       | 2.606       | 0.757       | 2.722       | 1.309       | 1.015       | 2.229       | 1.759       | 4.753       | 3.519       | 4.263       | 5.963       | Infinity    | 0.862       | 1.202       | 0.866       | 1.716       |
| / KR10-KJ | 4.025       | 3.676       | 2.873       | 0.669       | 2.848       | 1.420       | 0.939       | 2.213       | 1.641       | 2.686       | 2.430       | 2.385       | 3.040       | 16.932      | 0.880       | 1.220       | 0.903       | 1.786       |
| / KR10-AD | -           | 2.827       | 1.983       | 0.612       | 1.492       | 1.227       | 0.964       | 1.379       | 0.921       | 1.928       | 1.465       | 2.003       | 2.046       | 3.822       | 0.606       | 0.798       | 0.624       | 2.354       |
| / KR10-YC | 0.081       | -           | 2.424       | 0.934       | 1.032       | 1.329       | 0.874       | 1.338       | 1.000       | 1.775       | 1.629       | 1.841       | 1.801       | 2.844       | 0.692       | 0.868       | 0.700       | 3.378       |
| / KR10-SJ | 0.112       | 0.093       | -           | 0.674       | 1.184       | 0.946       | 0.704       | 2.405       | 1.410       | 1.847       | 1.483       | 1.661       | 1.473       | 2.448       | 0.820       | 1.048       | 0.856       | 1.588       |
| / KR11-CW | 0.290       | 0.211       | 0.271       | -           | 0.460       | 0.520       | 0.335       | 0.650       | 0.524       | 0.669       | 0.523       | 0.575       | 0.596       | 0.792       | 0.340       | 0.391       | 0.368       | 0.578       |
| / KR11-SC | 0.144       | 0.195       | 0.174       | 0.352       | -           | 1.117       | 0.863       | 2.341       | 1.697       | 1.917       | 1.924       | 1.709       | 1.940       | 4.093       | 0.828       | 1.201       | 0.824       | 0.955       |
| / CN09-BJ | 0.169       | 0.158       | 0.209       | 0.325       | 0.183       | -           | 4.719       | 1.298       | 1.031       | 1.362       | 1.390       | 1.315       | 1.136       | 1.588       | 0.750       | 0.909       | 0.682       | 0.995       |
| / CN10-TJ | 0.206       | 0.222       | 0.262       | 0.427       | 0.225       | 0.050       | -           | 0.938       | 0.649       | 0.968       | 1.001       | 1.046       | 0.971       | 1.117       | 0.650       | 0.934       | 0.675       | 0.751       |
| / CN11-YT | 0.153       | 0.157       | 0.094       | 0.278       | 0.096       | 0.161       | 0.210       | -           | 6.162       | 3.056       | 2.163       | 2.074       | 2.331       | 3.261       | 1.001       | 1.602       | 1.133       | 1.316       |
| / CN11-HY | 0.214       | 0.200       | 0.151       | 0.323       | 0.128       | 0.195       | 0.278       | 0.039       | -           | 3.476       | 2.421       | 1.688       | 1.834       | 3.003       | 0.794       | 1.124       | 0.870       | 0.914       |
| / CN11-QD | 0.115       | 0.123       | 0.119       | 0.272       | 0.115       | 0.155       | 0.205       | 0.076       | 0.067       | -           | 9.329       | 5.186       | 4.302       | 7.166       | 0.788       | 1.047       | 0.848       | 1.235       |
| / CN11-LY | 0.146       | 0.133       | 0.144       | 0.323       | 0.115       | 0.152       | 0.200       | 0.104       | 0.094       | 0.026       | -           | 5.894       | 5.005       | 3.914       | 0.676       | 0.977       | 0.775       | 1.149       |
| / CN11-RZ | 0.111       | 0.120       | 0.131       | 0.303       | 0.128       | 0.160       | 0.193       | 0.108       | 0.129       | 0.046       | 0.041       | -           | 21.320      | 4.782       | 0.619       | 0.920       | 0.668       | 1.157       |
| / CN11-LG | 0.109       | 0.122       | 0.145       | 0.295       | 0.114       | 0.180       | 0.205       | 0.097       | 0.120       | 0.055       | 0.048       | 0.012       | -           | 7.075       | 0.648       | 0.932       | 0.713       | 1.285       |
| / CN10-SH | 0.061       | 0.081       | 0.093       | 0.240       | 0.058       | 0.136       | 0.183       | 0.071       | 0.077       | 0.034       | 0.060       | 0.050       | 0.034       | -           | 0.906       | 1.275       | 0.879       | 1.950       |
| / CN10-NB | 0.292       | 0.265       | 0.234       | 0.423       | 0.232       | 0.250       | 0.278       | 0.200       | 0.239       | 0.241       | 0.270       | 0.288       | 0.278       | 0.216       | -           | 3.263       | 4.215       | 0.659       |
| / CN10-TT | 0.239       | 0.224       | 0.193       | 0.390       | 0.172       | 0.216       | 0.211       | 0.135       | 0.182       | 0.193       | 0.204       | 0.214       | 0.212       | 0.164       | 0.071       | -           | 5.117       | 0.913       |
| / CN10-LA | 0.286       | 0.263       | 0.226       | 0.405       | 0.233       | 0.268       | 0.270       | 0.181       | 0.223       | 0.228       | 0.244       | 0.272       | 0.260       | 0.221       | 0.056       | 0.047       | -           | 0.757       |
| / JP10-HS | 0.096       | 0.069       | 0.136       | 0.302       | 0.207       | 0.201       | 0.250       | 0.160       | 0.215       | 0.168       | 0.179       | 0.178       | 0.163       | 0.114       | 0.275       | 0.215       | 0.248       | -           |

**Table S2.** Results of the bottleneck test based on the two mutation models, SMM and TPM, using a nonparametric Wilcoxon signed-rank test

| Pop. ID | Wilcowon signed-rank tests |        | Mode shift   | MODE-Shift |       |       |       |       |       |       |       |       |       |  |  |
|---------|----------------------------|--------|--------------|------------|-------|-------|-------|-------|-------|-------|-------|-------|-------|--|--|
|         | TPM                        | SMM    |              |            |       |       |       |       |       |       |       |       |       |  |  |
| KR06-CA | 0.2593                     | 0.1697 | normal       | 0.432      | 0.114 | 0.045 | 0.068 | 0.136 | 0.091 | 0.045 | 0.000 | 0.023 | 0.045 |  |  |
| KR07-SL | 0.1030                     | 0.0615 | shifted mode | 0.282      | 0.308 | 0.077 | 0.051 | 0.026 | 0.103 | 0.000 | 0.128 | 0.000 | 0.026 |  |  |
| KR08-SG | 0.0320                     | 0.0067 | normal       | 0.566      | 0.113 | 0.057 | 0.019 | 0.038 | 0.038 | 0.075 | 0.038 | 0.019 | 0.038 |  |  |
| KR09-GG | 0.0031                     | 0.0012 | normal       | 0.609      | 0.125 | 0.031 | 0.047 | 0.031 | 0.031 | 0.047 | 0.031 | 0.047 | 0.000 |  |  |
| KR09-JE | 0.0415                     | 0.0415 | normal       | 0.351      | 0.216 | 0.081 | 0.081 | 0.000 | 0.000 | 0.135 | 0.054 | 0.054 | 0.027 |  |  |
| KR09-GB | 0.4251                     | 0.2847 | shifted mode | 0.000      | 0.212 | 0.303 | 0.061 | 0.061 | 0.152 | 0.030 | 0.061 | 0.061 | 0.061 |  |  |
| KR09-GW | 0.0415                     | 0.0061 | normal       | 0.477      | 0.159 | 0.068 | 0.068 | 0.023 | 0.023 | 0.091 | 0.000 | 0.045 | 0.045 |  |  |
| KR10-SL | 0.0053                     | 0.0017 | normal       | 0.426      | 0.149 | 0.149 | 0.000 | 0.064 | 0.021 | 0.043 | 0.043 | 0.085 | 0.021 |  |  |
| KR10-IN | 0.1018                     | 0.0212 | normal       | 0.491      | 0.182 | 0.073 | 0.055 | 0.018 | 0.018 | 0.073 | 0.036 | 0.018 | 0.036 |  |  |
| KR10-NY | 0.0046                     | 0.0017 | normal       | 0.490      | 0.204 | 0.041 | 0.041 | 0.020 | 0.061 | 0.020 | 0.020 | 0.102 | 0.000 |  |  |
| KR10-SW | 0.0031                     | 0.0006 | normal       | 0.549      | 0.118 | 0.020 | 0.078 | 0.039 | 0.039 | 0.059 | 0.020 | 0.020 | 0.059 |  |  |
| KR10-IC | 0.0171                     | 0.0040 | normal       | 0.417      | 0.208 | 0.042 | 0.063 | 0.063 | 0.042 | 0.042 | 0.063 | 0.042 | 0.021 |  |  |
| KR10-AS | 0.2119                     | 0.0881 | normal       | 0.293      | 0.293 | 0.024 | 0.049 | 0.122 | 0.049 | 0.049 | 0.024 | 0.073 | 0.024 |  |  |
| KR10-CA | 0.0647                     | 0.0067 | normal       | 0.429      | 0.204 | 0.082 | 0.041 | 0.020 | 0.061 | 0.061 | 0.061 | 0.041 | 0.000 |  |  |
| KR10-CY | 0.0212                     | 0.0212 | normal       | 0.375      | 0.271 | 0.063 | 0.042 | 0.021 | 0.021 | 0.083 | 0.083 | 0.000 | 0.042 |  |  |
| KR10-NS | 0.0171                     | 0.0031 | normal       | 0.564      | 0.091 | 0.109 | 0.018 | 0.018 | 0.018 | 0.073 | 0.091 | 0.000 | 0.018 |  |  |
| KR10-GC | 0.0320                     | 0.0031 | normal       | 0.482      | 0.196 | 0.054 | 0.054 | 0.036 | 0.036 | 0.071 | 0.036 | 0.000 | 0.036 |  |  |
| KR10-GJ | 0.1506                     | 0.1167 | normal       | 0.391      | 0.174 | 0.065 | 0.087 | 0.087 | 0.022 | 0.109 | 0.000 | 0.022 | 0.043 |  |  |
| KR10-BA | 0.0053                     | 0.0023 | normal       | 0.479      | 0.104 | 0.104 | 0.063 | 0.021 | 0.021 | 0.104 | 0.042 | 0.042 | 0.021 |  |  |
| KR10-KJ | 0.0615                     | 0.0415 | shifted mode | 0.250      | 0.306 | 0.028 | 0.083 | 0.056 | 0.083 | 0.083 | 0.028 | 0.056 | 0.028 |  |  |
| KR10-AD | 0.3501                     | 0.2886 | normal       | 0.207      | 0.207 | 0.103 | 0.069 | 0.069 | 0.069 | 0.138 | 0.034 | 0.000 | 0.103 |  |  |
| KR10-YC | 0.3667                     | 0.2593 | normal       | 0.308      | 0.205 | 0.103 | 0.051 | 0.026 | 0.026 | 0.128 | 0.077 | 0.051 | 0.026 |  |  |
| KR10-SJ | 0.9739                     | 0.9243 | shifted mode | 0.172      | 0.034 | 0.207 | 0.069 | 0.103 | 0.207 | 0.034 | 0.103 | 0.000 | 0.069 |  |  |
| KR10-CW | 0.7813                     | 0.7188 | shifted mode | 0.154      | 0.000 | 0.231 | 0.154 | 0.077 | 0.077 | 0.000 | 0.154 | 0.000 | 0.154 |  |  |
| KR11-SC | 0.1030                     | 0.0337 | normal       | 0.463      | 0.122 | 0.073 | 0.073 | 0.024 | 0.098 | 0.024 | 0.049 | 0.049 | 0.024 |  |  |
| CN09-BJ | 0.0874                     | 0.0615 | normal       | 0.286      | 0.286 | 0.048 | 0.119 | 0.048 | 0.024 | 0.119 | 0.048 | 0.000 | 0.024 |  |  |
| CN10-TJ | 0.5508                     | 0.3823 | normal       | 0.314      | 0.114 | 0.143 | 0.143 | 0.029 | 0.057 | 0.057 | 0.086 | 0.029 | 0.029 |  |  |
| CN11-YT | 0.7881                     | 0.6614 | normal       | 0.383      | 0.128 | 0.106 | 0.064 | 0.106 | 0.085 | 0.128 | 0.000 | 0.000 | 0.000 |  |  |
| CN11-HY | 0.7114                     | 0.5508 | normal       | 0.375      | 0.050 | 0.175 | 0.075 | 0.125 | 0.050 | 0.100 | 0.050 | 0.000 | 0.000 |  |  |
| CN11-QD | 0.2119                     | 0.1167 | normal       | 0.429      | 0.163 | 0.102 | 0.041 | 0.041 | 0.082 | 0.041 | 0.082 | 0.020 | 0.000 |  |  |
| CN11-LY | 0.8669                     | 0.7881 | normal       | 0.231      | 0.231 | 0.103 | 0.103 | 0.051 | 0.103 | 0.077 | 0.026 | 0.077 | 0.000 |  |  |
| CN11-RZ | 0.2593                     | 0.1506 | normal       | 0.440      | 0.180 | 0.080 | 0.080 | 0.020 | 0.060 | 0.060 | 0.000 | 0.020 | 0.060 |  |  |
| CN11-LG | 0.2119                     | 0.1697 | normal       | 0.404      | 0.191 | 0.128 | 0.043 | 0.000 | 0.021 | 0.085 | 0.043 | 0.085 | 0.000 |  |  |
| CN10-SH | 0.0320                     | 0.0040 | normal       | 0.571      | 0.125 | 0.036 | 0.018 | 0.054 | 0.054 | 0.054 | 0.054 | 0.000 | 0.036 |  |  |
| CN10-NB | 0.0757                     | 0.0386 | normal       | 0.475      | 0.180 | 0.098 | 0.066 | 0.082 | 0.016 | 0.000 | 0.033 | 0.016 | 0.033 |  |  |
| CN10-TT | 0.5452                     | 0.1167 | normal       | 0.466      | 0.155 | 0.138 | 0.069 | 0.052 | 0.017 | 0.052 | 0.034 | 0.017 | 0.000 |  |  |
| CN10-LA | 0.0031                     | 0.0009 | normal       | 0.598      | 0.195 | 0.069 | 0.034 | 0.034 | 0.011 | 0.034 | 0.000 | 0.011 | 0.011 |  |  |
| JP10-HS | 0.9998                     | 0.9988 | shifted mode | 0.077      | 0.192 | 0.077 | 0.154 | 0.077 | 0.154 | 0.154 | 0.077 | 0.038 | 0.000 |  |  |

**Table S3.** Mean assignment rate of individuals into (rows) and from (columns) each population using GeneClass 2 (Piry et al. 2004). Values in bold and underlined indicate the proportions of individuals assigned to the source population. Zero values were excluded from the table. The cells were gradiented according to the size range of the numbers (see note)

|           | KR06-<br>CA         | KR07-<br>SL         | KR08-<br>SG         | KR09-<br>GG         | KR09-<br>JE         | KR09-<br>GB         | KR09-<br>GW         | KR10-<br>SL         | KR10-<br>IN         | KR10-<br>NY         | KR10-<br>SW         | KR10-<br>IC         | KR10-<br>AS         | KR10-<br>CA         | KR10-<br>CY         | KR10-<br>NS         | KR10-<br>GC         | KR10-<br>GJ         | KR10-<br>BA         | KR10-<br>KJ         |
|-----------|---------------------|---------------------|---------------------|---------------------|---------------------|---------------------|---------------------|---------------------|---------------------|---------------------|---------------------|---------------------|---------------------|---------------------|---------------------|---------------------|---------------------|---------------------|---------------------|---------------------|
| / KR06-CA | <b><u>0.401</u></b> | 0.126               |                     | 0.152               |                     | 0.156               | <u>0.059</u>        |                     | 0.130               | <u>0.052</u>        | 0.144               | 0.187               | 0.146               | 0.161               | 0.111               | 0.134               | 0.199               | <u>0.082</u>        | <u>0.074</u>        | <u>0.059</u>        |
| / KR07-SL | <u>0.085</u>        | <b><u>0.257</u></b> | 0.166               | 0.213               | 0.144               | 0.257               | <u>0.055</u>        | 0.136               | 0.176               | 0.212               | 0.152               | 0.179               | 0.141               | 0.215               | 0.241               | 0.276               | 0.201               | 0.174               | 0.156               | <u>0.083</u>        |
| / KR08-SG | 0.120               | 0.214               | <b><u>0.421</u></b> | 0.456               | 0.243               | 0.284               | 0.250               | 0.351               | 0.385               | 0.330               | 0.324               | 0.315               | 0.266               | 0.328               | 0.318               | 0.442               | 0.468               | 0.298               | 0.327               | 0.234               |
| / KR09-GG | 0.141               | 0.180               | 0.303               | <b><u>0.436</u></b> | 0.181               | 0.302               | 0.146               | 0.306               | 0.381               | 0.312               | 0.316               | 0.400               | 0.315               | 0.339               | 0.321               | 0.416               | 0.374               | 0.289               | 0.276               | 0.182               |
| / KR09-JE | 0.144               | 0.372               | 0.445               | 0.418               | <b><u>0.285</u></b> | 0.297               | 0.221               | 0.322               | 0.422               | 0.365               | 0.452               | 0.284               | 0.223               | 0.318               | 0.386               | 0.422               | 0.478               | 0.275               | 0.279               | 0.190               |
| / KR09-GB | <u>0.051</u>        | 0.161               | 0.179               | 0.303               | 0.140               | <b><u>0.133</u></b> |                     | 0.121               | 0.225               | 0.178               | 0.173               | 0.184               | 0.241               | 0.184               | 0.262               | 0.335               | 0.291               | 0.344               | 0.122               | 0.166               |
| / KR09-GW | 0.193               | 0.309               | 0.426               | 0.401               | 0.299               | 0.283               | <b><u>0.382</u></b> | 0.353               | 0.385               | 0.377               | 0.342               | 0.328               | 0.239               | 0.432               | 0.322               | 0.398               | 0.534               | 0.253               | 0.280               | 0.267               |
| / KR10-SL | 0.114               | 0.240               | 0.428               | 0.457               | 0.230               | 0.332               | 0.257               | <b><u>0.398</u></b> | 0.433               | 0.376               | 0.392               | 0.429               | 0.298               | 0.338               | 0.416               | 0.542               | 0.515               | 0.367               | 0.386               | 0.271               |
| / KR10-IN | 0.118               | 0.208               | 0.294               | 0.389               | 0.201               | 0.264               | 0.183               | 0.271               | <b><u>0.460</u></b> | 0.296               | 0.333               | 0.299               | 0.235               | 0.330               | 0.328               | 0.350               | 0.371               | 0.265               | 0.291               | 0.199               |
| / KR10-NY | 0.104               | 0.246               | 0.264               | 0.309               | 0.216               | 0.293               | 0.198               | 0.292               | 0.313               | <b><u>0.373</u></b> | 0.245               | 0.257               | 0.206               | 0.210               | 0.276               | 0.386               | 0.399               | 0.283               | 0.281               | 0.206               |
| / KR10-SW | 0.110               | 0.204               | 0.255               | 0.355               | 0.182               | 0.248               | 0.153               | 0.279               | 0.341               | 0.251               | <b><u>0.384</u></b> | 0.392               | 0.255               | 0.251               | 0.277               | 0.368               | 0.418               | 0.265               | 0.244               | 0.186               |
| / KR10-IC | <u>0.095</u>        | 0.141               | 0.204               | 0.382               | <u>0.068</u>        | 0.232               | 0.112               | 0.282               | 0.251               | 0.201               | 0.300               | <b><u>0.364</u></b> | 0.275               | 0.350               | 0.265               | 0.391               | 0.315               | 0.229               | 0.189               | 0.146               |
| / KR10-AS | 0.151               | 0.220               | 0.217               | 0.421               | 0.153               | 0.296               | <u>0.083</u>        | 0.263               | 0.276               | 0.291               | 0.344               | 0.410               | <b><u>0.419</u></b> | 0.304               | 0.291               | 0.406               | 0.396               | 0.294               | 0.252               | 0.211               |
| / KR10-CA | 0.160               | 0.247               | 0.169               | 0.336               | 0.150               | 0.307               | 0.156               | 0.196               | 0.295               | 0.209               | 0.324               | 0.385               | 0.255               | <b><u>0.437</u></b> | 0.352               | 0.378               | 0.281               | 0.224               | 0.215               | 0.144               |
| / KR10-CY | <u>0.074</u>        | 0.202               | 0.209               | 0.330               | 0.195               | 0.320               | 0.111               | 0.226               | 0.328               | 0.310               | 0.305               | 0.340               | 0.254               | 0.302               | <b><u>0.431</u></b> | 0.451               | 0.364               | 0.259               | 0.287               | 0.139               |
| / KR10-NS | <u>0.052</u>        | 0.160               | 0.229               | 0.332               | 0.171               | 0.301               | <u>0.097</u>        | 0.321               | 0.260               | 0.306               | 0.259               | 0.317               | 0.187               | 0.281               | 0.349               | <b><u>0.367</u></b> | 0.336               | 0.201               | 0.244               | <u>0.096</u>        |
| / KR10-GC | <u>0.058</u>        | <u>0.074</u>        | 0.155               | 0.213               | 0.121               | 0.163               | <u>0.091</u>        | 0.121               | 0.147               | 0.127               | 0.148               | 0.158               | 0.114               | 0.102               | 0.138               | 0.212               | <b><u>0.366</u></b> | 0.216               | 0.137               | 0.112               |
| / KR10-GJ | 0.106               | 0.183               | 0.217               | 0.398               | 0.147               | 0.348               | 0.118               | 0.243               | 0.340               | 0.247               | 0.309               | 0.355               | 0.294               | 0.270               | 0.303               | 0.371               | 0.512               | <b><u>0.420</u></b> | 0.247               | 0.276               |
| / KR10-BA | <u>0.055</u>        | 0.175               | 0.315               | 0.396               | 0.218               | 0.289               | 0.169               | 0.342               | 0.444               | 0.326               | 0.332               | 0.365               | 0.326               | 0.248               | 0.377               | 0.505               | 0.566               | 0.321               | <b><u>0.350</u></b> | 0.243               |
| / KR10-KJ | <u>0.073</u>        | 0.139               | 0.202               | 0.265               | 0.176               | 0.299               | <u>0.081</u>        | 0.211               | 0.298               | 0.291               | 0.230               | 0.259               | 0.267               | 0.212               | 0.228               | 0.393               | 0.479               | 0.323               | 0.268               | <b><u>0.296</u></b> |
| / KR10-AD | 0.140               | 0.293               | 0.349               | 0.483               | 0.270               | 0.438               | 0.217               | 0.494               | 0.453               | 0.364               | 0.504               | 0.423               | 0.340               | 0.420               | 0.448               | 0.612               | 0.432               | 0.399               | 0.448               | 0.282               |
| / KR10-YC | <u>0.090</u>        | 0.263               | 0.239               | 0.405               | 0.199               | 0.291               | 0.128               | 0.244               | 0.278               | 0.188               | 0.197               | 0.285               | 0.336               | 0.321               | 0.293               | 0.408               | 0.383               | 0.304               | 0.212               | 0.231               |
| / KR10-SJ | <u>0.077</u>        | 0.254               | 0.209               | 0.336               | 0.141               | 0.547               | <u>0.058</u>        | 0.247               | 0.373               | 0.200               | 0.227               | 0.251               | 0.230               | 0.216               | 0.273               | 0.418               | 0.399               | 0.519               | 0.186               | 0.266               |
| / KR11-CW | 0.491               | 0.550               | 0.824               | 0.712               | 0.487               | 0.334               | 0.629               | 0.654               | 0.796               | 0.551               | 0.476               | 0.506               | 0.518               | 0.627               | 0.508               | 0.752               | 0.688               | 0.331               | 0.662               | 0.627               |
| / KR11-SC |                     | 0.096               | 0.126               | 0.102               | 0.125               | 0.118               | <u>0.054</u>        | 0.111               | 0.085               | 0.152               | 0.184               | 0.194               | <u>0.093</u>        | 0.086               | 0.136               | 0.152               | 0.157               | 0.084               | 0.090               | 0.072               |
| / CN09-BJ |                     | <u>0.030</u>        |                     |                     |                     |                     |                     |                     |                     |                     |                     |                     |                     |                     |                     | <u>0.016</u>        | <u>0.012</u>        |                     |                     |                     |
| / CN10-TJ | 0.070               | 0.074               |                     | 0.063               |                     | 0.130               |                     | 0.038               | 0.035               |                     | 0.086               | 0.107               | 0.047               | 0.066               | 0.087               | 0.143               | 0.096               | 0.049               | 0.047               | 0.030               |
| / CN11-YT |                     |                     | 0.035               | 0.030               | 0.035               | 0.086               |                     | 0.049               | 0.055               | 0.036               | 0.046               | 0.075               | 0.079               | 0.064               | 0.038               | 0.121               | 0.057               | 0.049               | 0.039               |                     |
| / CN11-HY |                     | 0.020               | 0.055               | 0.066               | 0.050               | 0.114               |                     | 0.059               | 0.075               | 0.112               | 0.058               | 0.057               | 0.032               | 0.038               | 0.059               | 0.153               | 0.102               | 0.032               | 0.032               | 0.011               |
| / CN11-QD | <u>0.059</u>        | 0.080               | 0.129               | 0.132               | 0.116               | 0.184               | <u>0.052</u>        | 0.148               | 0.172               | 0.150               | 0.179               | 0.196               | 0.148               | 0.102               | 0.197               | 0.243               | 0.172               | 0.146               | 0.140               | 0.079               |
| / CN11-LY |                     | 0.157               | 0.146               | 0.107               | 0.123               | 0.138               |                     | 0.122               | 0.134               | 0.186               | 0.200               | 0.124               | <u>0.096</u>        |                     | 0.141               | 0.214               | 0.213               | 0.137               | 0.081               | 0.073               |
| / CN11-RZ |                     | 0.138               | 0.192               | 0.188               | 0.122               | 0.205               | <u>0.096</u>        | 0.171               | 0.141               | 0.157               | 0.148               | 0.111               | <u>0.078</u>        | 0.140               | <u>0.090</u>        | 0.273               | 0.233               | 0.131               | 0.093               | 0.128               |
| / CN11-LG | <u>0.055</u>        | 0.109               | 0.247               | 0.257               | 0.154               | 0.233               | 0.133               | 0.204               | 0.246               | 0.214               | 0.251               | 0.184               | 0.121               | 0.207               | 0.180               | 0.325               | 0.341               | 0.153               | 0.139               | 0.133               |
| / CN10-SH | <u>0.085</u>        | 0.151               | 0.250               | 0.328               | 0.176               | 0.230               | 0.118               | 0.249               | 0.333               | 0.280               | 0.276               | 0.332               | 0.248               | 0.232               | 0.248               | 0.393               | 0.371               | 0.177               | 0.260               | 0.167               |
| / CN10-NB |                     |                     |                     |                     |                     |                     |                     |                     |                     |                     |                     |                     |                     |                     |                     |                     |                     |                     |                     |                     |
| / CN10-TT |                     |                     |                     |                     |                     |                     |                     |                     |                     |                     |                     |                     |                     |                     |                     |                     |                     |                     |                     |                     |
| / CN10-LA |                     |                     |                     |                     |                     |                     |                     |                     |                     |                     |                     |                     |                     |                     |                     |                     |                     |                     |                     |                     |
| / JP10-HS | 0.144               | 0.125               | 0.174               | 0.264               | 0.117               | 0.243               | 0.117               | 0.131               | 0.149               | 0.119               | 0.133               | 0.186               | 0.201               | 0.173               | 0.142               | 0.252               | 0.187               | 0.122               | 0.154               | 0.127               |

Table S3. (continued)

|           | KR10-<br>AD  | KR10-<br>YC  | KR10-<br>SJ  | KR11-<br>CW  | KR11-<br>SC  | CN09-<br>BJ  | CN10-<br>TJ  | CN11-<br>YT  | CN11-<br>HY  | CN11-<br>QD  | CN11-<br>LY  | CN11-<br>RZ  | CN11-<br>LG  | CN10-<br>SH  | CN10-<br>NB  | CN10-<br>TT  | CN10-<br>LA  | JP10-<br>HS  |
|-----------|--------------|--------------|--------------|--------------|--------------|--------------|--------------|--------------|--------------|--------------|--------------|--------------|--------------|--------------|--------------|--------------|--------------|--------------|
| / KR06-CA |              | 0.027        |              |              | 0.098        | 0.136        |              |              | 0.091        | 0.128        |              |              | 0.091        | 0.174        |              |              | 0.039        |              |
| / KR07-SL | 0.027        | 0.077        | 0.048        |              | 0.039        | 0.169        |              | 0.048        | 0.091        | 0.116        | 0.108        | 0.042        | 0.078        | 0.260        |              |              | 0.024        |              |
| / KR08-SG | 0.074        | 0.147        | 0.095        |              | 0.098        | 0.132        | 0.095        | 0.173        | 0.107        | 0.261        | 0.179        | 0.216        | 0.262        | 0.377        |              | 0.014        | 0.043        | 0.028        |
| / KR09-GG | 0.056        | 0.110        | 0.045        |              | 0.056        | 0.103        | 0.095        | 0.161        | 0.060        | 0.194        | 0.112        | 0.149        | 0.205        | 0.389        |              |              | 0.034        | 0.025        |
| / KR09-JE | 0.080        | 0.145        | 0.031        |              | 0.148        | 0.137        |              | 0.241        | 0.107        | 0.300        | 0.198        | 0.252        | 0.290        | 0.466        |              |              | 0.057        | 0.021        |
| / KR09-GB |              | 0.133        | 0.105        |              | 0.075        | 0.042        |              | 0.113        | 0.063        | 0.199        | 0.189        | 0.189        | 0.156        | 0.186        |              |              | 0.078        |              |
| / KR09-GW | 0.068        | 0.092        | 0.091        |              | 0.086        | 0.169        | 0.029        | 0.144        | 0.058        | 0.181        | 0.138        | 0.207        | 0.231        | 0.370        |              | 0.015        | 0.027        | 0.015        |
| / KR10-SL | 0.096        | 0.105        | 0.038        |              | 0.131        | 0.126        |              | 0.202        | 0.084        | 0.258        | 0.194        | 0.196        | 0.264        | 0.396        |              |              | 0.045        | 0.025        |
| / KR10-IN | 0.081        | 0.081        | 0.041        |              | 0.087        | 0.109        |              | 0.149        | 0.096        | 0.247        | 0.123        | 0.138        | 0.166        | 0.360        |              |              | 0.029        | 0.025        |
| / KR10-NY | 0.074        | 0.088        | 0.125        |              | 0.107        | 0.100        |              | 0.183        | 0.112        | 0.164        | 0.151        | 0.163        | 0.179        | 0.268        |              |              | 0.030        |              |
| / KR10-SW | 0.063        | 0.062        | 0.035        |              | 0.087        | 0.104        |              | 0.101        | 0.043        | 0.178        | 0.110        | 0.139        | 0.193        | 0.364        |              |              | 0.033        |              |
| / KR10-IC | 0.053        | 0.050        | 0.035        |              | 0.082        | 0.108        | 0.011        | 0.082        | 0.091        | 0.102        | 0.083        | 0.130        | 0.176        | 0.307        |              |              | 0.043        |              |
| / KR10-AS | 0.091        | 0.110        | 0.045        |              | 0.088        | 0.083        |              | 0.193        | 0.053        | 0.169        | 0.139        | 0.089        | 0.158        | 0.367        |              | 0.011        | 0.079        | 0.015        |
| / KR10-CA | 0.037        | 0.081        | 0.095        |              | 0.031        | 0.117        |              | 0.080        | 0.052        | 0.112        | 0.067        | 0.056        | 0.135        | 0.304        |              |              | 0.029        |              |
| / KR10-CY | 0.029        | 0.027        | 0.035        |              | 0.113        | 0.074        |              | 0.173        | 0.066        | 0.203        | 0.139        | 0.093        | 0.168        | 0.352        |              |              | 0.032        |              |
| / KR10-NS | 0.050        | 0.066        | 0.035        |              | 0.035        | 0.062        |              | 0.117        | 0.037        | 0.183        | 0.080        | 0.102        | 0.149        | 0.317        |              |              | 0.029        |              |
| / KR10-GC | 0.031        | 0.043        | 0.035        |              | 0.034        | 0.045        |              | 0.039        | 0.035        | 0.043        | 0.035        | 0.050        | 0.100        | 0.166        |              |              | 0.015        |              |
| / KR10-GJ | 0.063        | 0.137        | 0.073        |              | 0.031        | 0.089        | 0.011        | 0.111        | 0.030        | 0.156        | 0.130        | 0.164        | 0.180        | 0.277        |              |              | 0.023        | 0.050        |
| / KR10-BA | 0.034        | 0.050        | 0.035        |              | 0.045        | 0.069        |              | 0.150        | 0.102        | 0.244        | 0.100        | 0.172        | 0.224        | 0.437        |              | 0.011        | 0.053        |              |
| / KR10-KJ |              | 0.078        | 0.090        |              | 0.063        | 0.080        |              | 0.167        | 0.056        | 0.184        | 0.091        | 0.110        | 0.159        | 0.289        |              |              | 0.072        |              |
| / KR10-AD | <b>0.358</b> | 0.235        | 0.113        |              | 0.067        | 0.166        | 0.045        | 0.139        | 0.025        | 0.198        | 0.058        | 0.163        | 0.167        | 0.423        |              |              | 0.015        | 0.021        |
| / KR10-YC | 0.062        | <b>0.410</b> | 0.045        |              | 0.051        | 0.125        |              | 0.079        | 0.034        | 0.154        | 0.070        | 0.180        | 0.161        | 0.291        |              |              | 0.015        |              |
| / KR10-SJ | 0.095        | 0.167        | <b>0.461</b> |              | 0.040        | 0.049        |              | 0.218        | 0.115        | 0.249        | 0.102        | 0.220        | 0.132        | 0.335        |              |              | 0.142        |              |
| / KR11-CW | 0.255        | 0.642        | 0.041        | <b>0.470</b> | 0.270        | 0.643        | 0.076        | 0.451        | 0.302        | 0.583        | 0.320        | 0.440        | 0.411        | 0.717        |              |              | 0.046        | 0.122        |
| / KR11-SC |              |              |              |              | <b>0.424</b> | 0.013        |              | 0.205        | 0.097        | 0.179        | 0.122        | 0.116        | 0.104        | 0.226        |              | 0.025        | 0.050        |              |
| / CN09-BJ |              |              |              |              |              | <b>0.361</b> | 0.137        |              |              |              |              |              |              | 0.047        |              |              |              |              |
| / CN10-TJ |              |              |              |              |              | 0.476        | <b>0.442</b> |              |              |              |              |              |              | 0.082        |              |              |              |              |
| / CN11-YT |              |              |              |              | 0.027        |              |              | <b>0.439</b> | 0.128        | 0.135        | 0.034        | 0.049        | 0.043        | 0.112        |              | 0.015        | 0.062        |              |
| / CN11-HY |              |              |              |              | 0.045        |              |              | 0.344        | <b>0.382</b> | 0.242        | 0.169        | 0.075        | 0.106        | 0.129        |              | 0.015        | 0.044        |              |
| / CN11-QD | 0.012        | 0.024        | 0.022        |              | 0.066        | 0.036        |              | 0.233        | 0.185        | <b>0.398</b> | 0.259        | 0.150        | 0.157        | 0.254        |              |              | 0.041        | 0.011        |
| / CN11-LY |              |              |              |              | 0.117        | 0.020        |              | 0.224        | 0.179        | 0.409        | <b>0.432</b> | 0.232        | 0.221        | 0.212        |              |              | 0.028        |              |
| / CN11-RZ | 0.019        | 0.055        | 0.037        |              | 0.057        | 0.039        |              | 0.151        | 0.078        | 0.187        | 0.145        | <b>0.425</b> | 0.226        | 0.149        |              |              | 0.025        |              |
| / CN11-LG | 0.019        | 0.045        | 0.022        |              | 0.088        | 0.048        |              | 0.215        | 0.143        | 0.234        | 0.180        | 0.392        | <b>0.432</b> | 0.281        |              |              | 0.024        |              |
| / CN10-SH | 0.027        | 0.059        | 0.035        |              | 0.095        | 0.119        |              | 0.152        | 0.123        | 0.210        | 0.103        | 0.139        | 0.201        | <b>0.363</b> |              |              | 0.057        | 0.015        |
| / CN10-NB |              |              |              |              |              |              |              |              |              |              |              |              |              |              | <b>0.369</b> | 0.024        | 0.180        |              |
| / CN10-TT |              |              |              |              |              |              |              |              |              |              |              |              |              |              | 0.071        | <b>0.446</b> | 0.345        |              |
| / CN10-LA |              |              |              |              |              |              |              |              |              |              |              |              |              |              | 0.029        | 0.045        | <b>0.371</b> |              |
| / JP10-HS | 0.091        | 0.147        | 0.073        | 0.035        | 0.029        | 0.123        | 0.028        | 0.060        | 0.015        | 0.117        | 0.061        | 0.061        | 0.087        | 0.242        |              |              | 0.025        | <b>0.390</b> |

Note.

|          |      |       |         |       |       |       |       |       |       |       |       |       |       |       |       |       |       |       |       |
|----------|------|-------|---------|-------|-------|-------|-------|-------|-------|-------|-------|-------|-------|-------|-------|-------|-------|-------|-------|
| gradient | 0.00 | 0.000 | ≥ 0.001 | 0.100 | ≥ 0.1 | 0.200 | ≥ 0.2 | 0.300 | ≥ 0.3 | 0.400 | ≥ 0.4 | 0.500 | ≥ 0.5 | 0.600 | ≥ 0.6 | 0.700 | ≥ 0.7 | 0.800 | ≥ 0.8 |
| /range   |      |       | < 0.1   |       | < 0.2 |       | < 0.3 |       | < 0.4 |       | < 0.5 |       | < 0.6 |       | < 0.7 |       | < 0.8 |       |       |
